# Supplementary material
Source: PubMed Central journal article supplement (PMC4123218)
Supplement: NIHMS593333-supplement-Supplemental_Data.pdf [file NIHMS593333-supplement-Supplemental_Data.pdf]

**Supplemental Figure 1.** Body and prostate gland weights of C57BL/6J and TRAMP mice: **A.** Body weight change of C57BL/6J. **B.** Prostate weight of C57BL/6J. **C.** Body weight change of TRAMP. **D.** Prostate weight of TRAMP. There were no noticeable changes in weights of body and prostate after treatment of all the three doses of Polyphenon E in C57BL/6J and TRAMP mice. As expected, the body and prostate weights of mice in all groups increased with age. There is no significant difference between Polyphenon E treatment and control groups. However, significant difference of prostate weight was observed between untreated C57BL/6J and TRAMP mouse groups at 32 weeks old ( $P<0.001$ ).

**Supplemental Figure 2.** Mean distribution-adjusted lesion grade of different lobes (anterior, dorsal, lateral and ventral) of the prostate in control TRAMP mice and mice treated with low, medium and high doses of Polyphenon E.

**Table 1.** Hematology and serum biochemistry results for C57BL/6J male mice treated with Polyphenon E

| Variables       | Unit               | Control (n=3) | Low (n=3)    | Medium (n=3)  | High (n=3)   | <i>P</i> value |
|-----------------|--------------------|---------------|--------------|---------------|--------------|----------------|
| WBC             | 10 <sup>9</sup> /L | 5.83±0.88     | 9.8±1.85     | 6.97±4.22     | 4.67±1.69    | 0.27           |
| Lymphocyte      | %                  | 81.4±0.68     | 82.9±1.06    | 77.5±4.63     | 77.1±3.09    | 0.19           |
| Monocyte        | %                  | 6.06±0.12     | 5.03±0.45    | 5.43±0.34     | 5.97±1.02    | 0.32           |
| Granulocyte     | %                  | 12.5±0.57     | 12.1±0.74    | 17.1±4.74     | 16.9±2.08    | 0.17           |
| Hematocrit      | %                  | 36.96±1.22    | 38.43±0.46   | 37.93±0.70    | 38.6±0.21    | 0.21           |
| Hemoglobin      | g/dL               | 12.66±0.31    | 13.27±0.21   | 13.1±0.16     | 13.4±0.08    | 0.04           |
| Platelet        | 10 <sup>9</sup> /L | 656.33±33.2   | 567.33±33.87 | 473.33±117.03 | 474.67±156.2 | 0.28           |
| BUN             | mg/dL              | 26.1±1.80     | 27.1±2.40    | 24.23±0.69    | 24.13±2.17   | 0.37           |
| Creatinine      | mg/dL              | <0.2          | <0.2         | <0.2          | <0.2         |                |
| Phosphorus      | mg/dL              | 7.2±0.36      | 7.33±0.58    | 8.03±1.35     | 7.73±0.61    | 0.73           |
| Calcium         | mg/dL              | 10.3±0.0      | 10.17±0.05   | 10.17±0.12    | 10.27±0.17   | 0.33           |
| Total protein   | g/dL               | 5.6±0.14      | 5.53±0.19    | 5.43±0.09     | 5.5±0.08     | 0.67           |
| Albumin         | g/dL               | 2.97±0.05     | 2.97±0.17    | 2.87±0.12     | 2.86±0.09    | 0.71           |
| Globulin        | g/dL               | 2.63±0.09     | 2.57±0.05    | 2.57±0.05     | 2.63±0.05    | 0.55           |
| Glucose         | mg/dL              | 194.33±9.03   | 185.33±7.13  | 188.67±4.50   | 191.67±15.86 | 0.83           |
| ALT             | IU/L               | 16.67±0.47    | 19.67±1.70   | 37.0±21.92    | 20.0±0.82    | 0.22           |
| ALP             | IU/L               | 64.33±2.87    | 63.67±5.31   | 60.33±1.89    | 68.33±2.62   | 0.31           |
| GGT             | IU/L               | <10           | <10          | <10           | <10          |                |
| Total bilirubin | mg/dL              | 0.1±0.0       | 0.4±0.14     | 0.17±0.09     | 0.23±0.09    | 0.07           |

**Table 2.** Hematology and serum biochemistry results for TRAMP male mice treated with Polyphenon E

| Variables       | Unit               | Control (n=3) | Low (n=5)  | Medium (n=5) | High (n=6)  | <i>P</i> value |
|-----------------|--------------------|---------------|------------|--------------|-------------|----------------|
| WBC             | 10 <sup>9</sup> /L | 7.83±1.21     | 7.48±2.66  | 7.80±2.22    | 8.36±3.48   | 0.97           |
| Lymphocyte      | %                  | 77.4±3.80     | 77.2±3.86  | 77.6±4.93    | 71.4±5.53   | 0.20           |
| Monocyte        | %                  | 6.60±1.06     | 6.04±1.01  | 5.86±0.37    | 6.73±0.67   | 0.37           |
| Granulocyte     | %                  | 16.03±2.74    | 16.72±3.04 | 16.5±4.73    | 21.83±5.05  | 0.20           |
| Hematocrit      | %                  | 38.87±1.55    | 38.4±0.95  | 36.7±1.03    | 38.8±0.88   | 0.05           |
| Hemoglobin      | g/dL               | 13.1±0.33     | 13.08±0.24 | 12.5±0.34    | 13.1±0.30   | 0.03           |
| Platelet        | 10 <sup>9</sup> /L | 713.3±14.0    | 663.0±97.2 | 523.8±87.9   | 477.7±114.6 | 0.02           |
| BUN             | mg/dL              | 18.1±0.19     | 20.3±4.2   | 17.28±2.63   | 19.9±2.18   | 0.42           |
| Creatinine      | mg/dL              | <0.2          | <0.2       | <0.2         | <0.2        |                |
| Phosphorus      | mg/dL              | 6.9±0.41      | 6.54±0.80  | 7.20±0.65    | 7.77±0.68   | 0.09           |
| Calcium         | mg/dL              | 10.6±0.19     | 9.94±0.37  | 10.18±0.19   | 10.45±0.05  | 0.01           |
| Total protein   | g/dL               | 5.8±0.12      | 5.46±0.22  | 5.40±0.09    | 5.61±0.18   | 0.06           |
| Albumin         | g/dL               | 3.03±0.09     | 2.84±0.12  | 2.68±0.04    | 2.90±0.10   | 0.002          |
| Globulin        | g/dL               | 2.73±0.21     | 2.62±0.12  | 2.72±0.07    | 2.72±0.18   | 0.71           |
| Glucose         | mg/dL              | 220.7±5.79    | 215.6±21.3 | 229.6±21.18  | 211.0±19.63 | 0.55           |
| ALT             | IU/L               | 32.70±4.19    | 29.6±19.4  | 33.6±15.49   | 22.5±4.03   | 0.61           |
| ALP             | IU/L               | 66.7±2.05     | 71.8±7.14  | 57.4±8.48    | 67.33±6.39  | 0.06           |
| GGT             | IU/L               | <10           | <10        | <10          | <10         |                |
| Total bilirubin | mg/dL              | 0.10±0.0      | 0.14±0.08  | 0.18±0.10    | 0.12±0.04   | 0.47           |

**Table 3.** Results from imaging analysis for TRAMP male mice treated with Polyphenon E

| Variables    | Unit            | Control<br>(n=7) | Low<br>(n=6) | Medium<br>(n=6) | High<br>(n=7) | <i>P</i> value <sup>1</sup> | All treated<br>(n=19) | <i>P</i> value <sup>2</sup> |
|--------------|-----------------|------------------|--------------|-----------------|---------------|-----------------------------|-----------------------|-----------------------------|
| # tumor      | ea              | 1.57±0.98        | 0.83±0.41    | 1.0±0.0         | 0.86±0.38     | 0.09                        | 0.89±0.32             | 0.01                        |
| Unidimension |                 | 9.67±4.91        | 6.02±3.41    | 6.60±1.33       | 6.53±3.01     | 0.23                        | 6.39±2.61             | 0.04                        |
| Bidimension  |                 | 30.84±16.6       | 21.7±11.6    | 25.7±8.06       | 26.3±12.4     | 0.65                        | 24.7±10.5             | 0.27                        |
| Volume       | mm <sup>3</sup> | 107.5±60.1       | 90.0±76.9    | 92.5±53.6       | 80.2±36.3     | 0.85                        | 87.2±54.0             | 0.42                        |

<sup>1</sup>*P* values were estimated from ANOVA

<sup>2</sup>*P* values were estimated from t test comparing control vs. treated
